# Supplementary material
Source: MDPI journal article supplement (https://www.mdpi.com/2071-1050/15/8/6582)
Supplement: s1 [file s1]

Supplementary Material: Analysis of variance tables for the evaluated traits.

One-way ANOVA: Analysis of variance table for foliar area (cm²).

Control. Day 30 vs. Day 60 vs. Day 90.

| Source | DF | Adj (SS) | Adj (MS) | F-value | P-value |
|--------|----|----------|----------|---------|---------|
| Factor | 2  | 36.23    | 18.115   | 4.17    | 0.073   |
| Error  | 6  | 26.06    | 4.344    |         |         |
| Total  | 8  | 62.29    |          |         |         |

Minitab - ANOVA Foliar area TFvs1\_100Glivs1\_100Gli.mpx

File Edit Data Calc Stat Graph View Help Assistant Predictive Analytics Module Addition

Navigator

- ANOVA com um fator: C\_30. C\_...
- ANOVA com um fator: TF\_30. TF...
- ANOVA com um fator: 1/100GLI...
- ANOVA com um fator: C\_30. TF\_...
- ANOVA com um fator: C\_60. TF\_...
- ANOVA com um fator: C\_90. TF\_...

ANOVA com um fator: C\_3... x

WORKSHEET 3

**ANOVA com um fator: C\_30. C\_60. C\_90**

| Fonte | GL | SQ (Aj.) | QM (Aj.) | Valor F | Valor-P |
|-------|----|----------|----------|---------|---------|
| Fator | 2  | 36,23    | 18,115   | 4,17    | 0,073   |
| Erro  | 6  | 26,06    | 4,344    |         |         |
| Total | 8  | 62,29    |          |         |         |

One-way ANOVA: Analysis of variance table for foliar area (cm²).

TF. Day 30 vs. Day 60 vs. Day 90.

TF: commercial fertilizer.

| Source | DF | Adj (SS) | Adj (MS) | F-value | P-value |
|--------|----|----------|----------|---------|---------|
| Factor | 2  | 34.99    | 17.497   | 2.45    | 0.167   |
| Error  | 6  | 42.93    | 7.154    |         |         |
| Total  | 8  | 77.92    |          |         |         |

Minitab - ANOVA Foliar area TFvs1\_100Glivs1\_100Gli.mpx

File Edit Data Calc Stat Graph View Help Assistant Predictive Analytics Module Additional To

Navigator

- ANOVA com um fator: C\_30. C\_...
- ANOVA com um fator: TF\_30. TF...
- ANOVA com um fator: 1/100GLI...
- ANOVA com um fator: C\_30. TF\_...
- ANOVA com um fator: C\_60. TF\_...
- ANOVA com um fator: C\_90. TF\_...

ANOVA com um fator: TF\_... x

WORKSHEET 3

**ANOVA com um fator: TF\_30. TF\_60. TF\_90**

**Análise de Variância**

| Fonte | GL | SQ (Aj.) | QM (Aj.) | Valor F | Valor-P |
|-------|----|----------|----------|---------|---------|
| Fator | 2  | 34,99    | 17,497   | 2,45    | 0,167   |
| Erro  | 6  | 42,93    | 7,154    |         |         |
| Total | 8  | 77,92    |          |         |         |

One-way ANOVA: Analysis of variance table for foliar area (cm<sup>2</sup>).

1/100GLI. Day 30 vs. Day 60 vs. Day 90.

1/100GLI: 1% NSBMH.

| Source | DF | Adj (SS) | Adj (MS) | F-value | P-value |
|--------|----|----------|----------|---------|---------|
| Factor | 2  | 202.997  | 101.499  | 70.77   | 0.000   |
| Error  | 6  | 8.606    | 1.434    |         |         |
| Total  | 8  | 211.603  |          |         |         |

Minitab - ANOVA Foliar area TFvs1\_100Glivs1\_100GLI.mpx

File Edit Data Calc Stat Graph View Help Assistant Predictive Analytics Module Additional Tools

Navigator

- ANOVA com um fator: C\_30. C\_...
- ANOVA com um fator: TF\_30. TF...
- ANOVA com um fator: 1/100GLI...**
- ANOVA com um fator: C\_30. TF...
- ANOVA com um fator: C\_60. TF...
- ANOVA com um fator: C\_90. TF...

ANOVA com um fator: 1/10...

WORKSHEET 3

**ANOVA com um fator: 1/100GLI\_30. 1/100GLI\_60. 1/100GLI\_90**

**Análise de Variância**

| Fonte | GL | SQ (Aj.) | QM (Aj.) | Valor F | Valor-P |
|-------|----|----------|----------|---------|---------|
| Fator | 2  | 202,997  | 101,499  | 70,77   | 0,000   |
| Erro  | 6  | 8,606    | 1,434    |         |         |
| Total | 8  | 211,603  |          |         |         |

One-way ANOVA: Analysis of variance table for foliar area (cm<sup>2</sup>).

C vs. TF vs. 1/100GLI. Day 30.

C: negative control.

TF: commercial fertilizer.

1/100GLI: 1% NSBMH.

| Source | DF | Adj (SS) | Adj (MS) | F-value | P-value |
|--------|----|----------|----------|---------|---------|
| Factor | 2  | 5.519    | 2.760    | 0.56    | 0.600   |
| Error  | 6  | 29.711   | 4.952    |         |         |
| Total  | 8  | 35.231   |          |         |         |

Minitab - ANOVA Foliar area TFvs1\_100Glivs1\_100GLI.mpx

File Edit Data Calc Stat Graph View Help Assistant Predictive Analytics Module Additional Tools

Navigator

- ANOVA com um fator: C\_30. C\_...
- ANOVA com um fator: TF\_30. TF...
- ANOVA com um fator: 1/100GLI...
- ANOVA com um fator: C\_30. TF...**
- ANOVA com um fator: C\_60. TF...
- ANOVA com um fator: C\_90. TF...

ANOVA com um fator: C\_3...

WORKSHEET 3

**ANOVA com um fator: C\_30. TF\_30. 1/100GLI\_30**

**Análise de Variância**

| Fonte | GL | SQ (Aj.) | QM (Aj.) | Valor F | Valor-P |
|-------|----|----------|----------|---------|---------|
| Fator | 2  | 5,519    | 2,760    | 0,56    | 0,600   |
| Erro  | 6  | 29,711   | 4,952    |         |         |
| Total | 8  | 35,231   |          |         |         |

One-way ANOVA: Analysis of variance table for foliar area (cm<sup>2</sup>).

C vs. TF vs. 1/100GLI. Day 60.

C: negative control.

TF: commercial fertilizer.

1/100GLI: 1% NSBMH.

| Source | DF | Adj (SS) | Adj (MS) | F-value | P-value |
|--------|----|----------|----------|---------|---------|
| Factor | 2  | 104.19   | 52.093   | 6.77    | 0.029   |
| Error  | 6  | 46.18    | 7.696    |         |         |
| Total  | 8  | 150.36   |          |         |         |

Minitab - ANOVA Foliar area TFvs1\_100Glivs1\_100Gli.mpx

File Edit Data Calc Stat Graph View Help Assistant Predictive Analytics Module Additional Tools

Navigator

ANOVA com um fator: C\_30. C\_...  
ANOVA com um fator: TF\_30. TF...  
ANOVA com um fator: 1/100GLI...  
ANOVA com um fator: C\_30. TF\_...  
**ANOVA com um fator: C\_60. TF\_...**  
ANOVA com um fator: C\_90. TF\_...

ANOVA com um fator: C\_6...

WORKSHEET 3

**ANOVA com um fator: C\_60. TF\_60. 1/100GLI\_60**

**Análise de Variância**

| Fonte | GL | SQ (Aj.) | QM (Aj.) | Valor F | Valor-P |
|-------|----|----------|----------|---------|---------|
| Fator | 2  | 104,19   | 52,093   | 6,77    | 0,029   |
| Erro  | 6  | 46,18    | 7,696    |         |         |
| Total | 8  | 150,36   |          |         |         |

**One-way ANOVA: Analysis of variance table for foliar area (cm²).**

**C vs. TF vs. 1/100GLI. Day 90.**

**C: negative control.**

**TF: commercial fertilizer.**

**1/100GLI: 1% NSBMH.**

| Source | DF | Adj (SS) | Adj (MS) | F-value | P-value |
|--------|----|----------|----------|---------|---------|
| Factor | 2  | 31.456   | 15.7281  | 55.27   | 0.000   |
| Error  | 6  | 1.707    | 0.2846   |         |         |
| Total  | 8  | 33.164   |          |         |         |

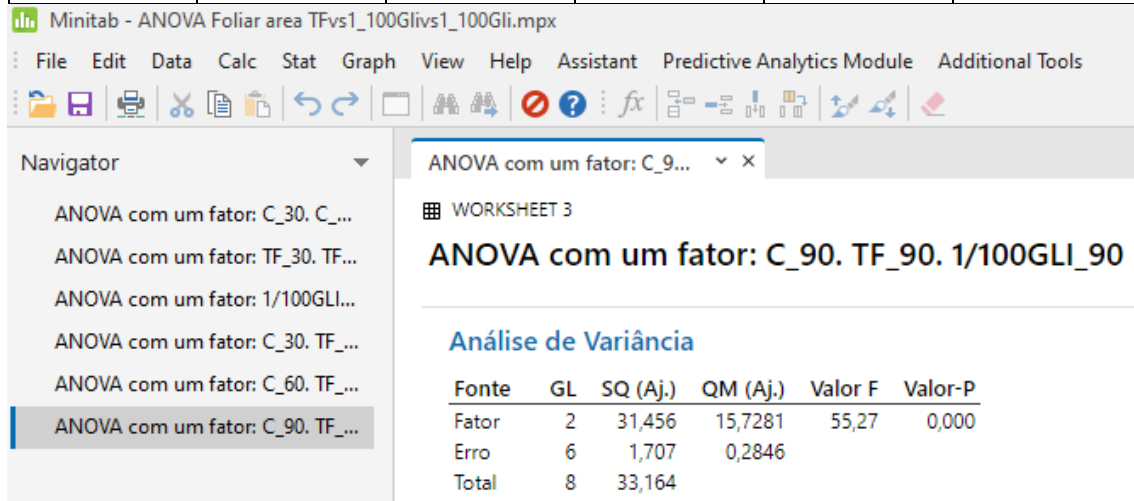

| Fonte | GL | SQ (Aj.) | QM (Aj.) | Valor F | Valor-P |
|-------|----|----------|----------|---------|---------|
| Fator | 2  | 31,456   | 15,7281  | 55,27   | 0,000   |
| Erro  | 6  | 1,707    | 0,2846   |         |         |
| Total | 8  | 33,164   |          |         |         |

**One-way ANOVA: Analysis of variance table for trifoliar leave number (N°)**

**FFTL: Fully formed trifoliar leaf.**

**C: negative control.**

**Tf: commercial fertilizer.**

**1/1002%Gli: 1% NSBMH.**

| Source | DF | Adj (SS) | Adj (MS) | F-value | P-value |
|--------|----|----------|----------|---------|---------|
| Factor | 2  | 4.025    | 2.012    | 1.85    | 0.236   |
| Error  | 6  | 6.519    | 1.086    |         |         |
| Total  | 8  | 10.543   |          |         |         |

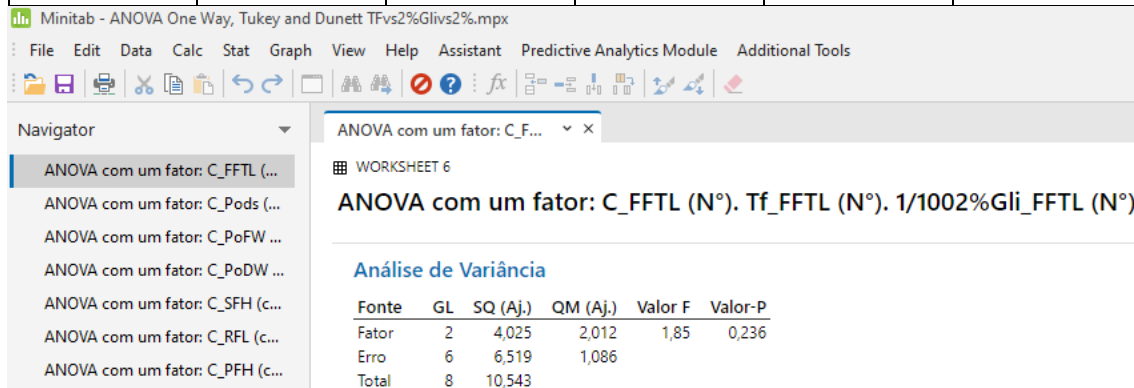

| Fonte | GL | SQ (Aj.) | QM (Aj.) | Valor F | Valor-P |
|-------|----|----------|----------|---------|---------|
| Fator | 2  | 4,025    | 2,012    | 1,85    | 0,236   |
| Erro  | 6  | 6,519    | 1,086    |         |         |
| Total | 8  | 10,543   |          |         |         |

One-way ANOVA: Analysis of variance table for chlorophyll pigment concentration a+b (ug cm<sup>-2</sup>).  
C vs. TF vs. 1/100GLI. Day 30.

C: negative control.

TF: commercial fertilizer.

1/100GLI: 1% NSBMH.

| Source | DF | Adj (SS) | Adj (MS) | F-value | P-value |
|--------|----|----------|----------|---------|---------|
| Factor | 2  | 6.983    | 3.492    | 0.36    | 0.711   |
| Error  | 6  | 58.057   | 9.676    |         |         |
| Total  | 8  | 65.041   |          |         |         |

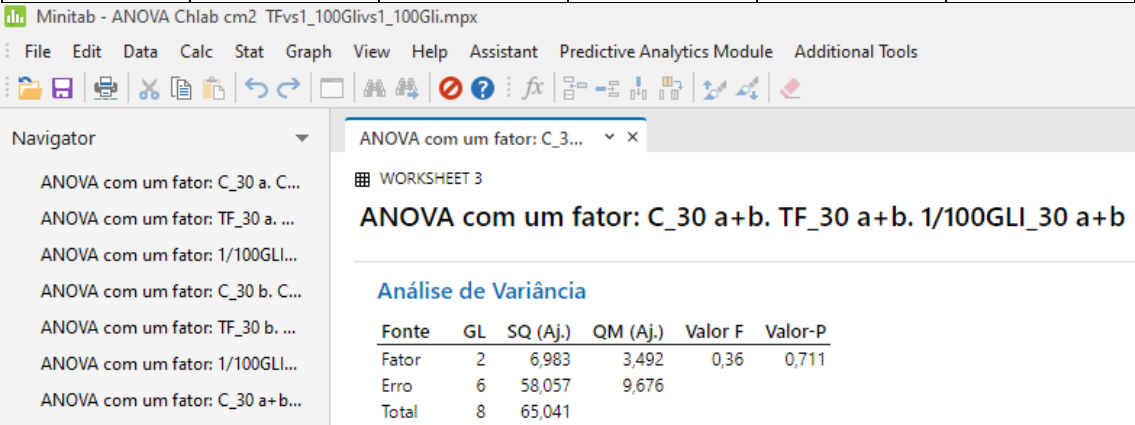

One-way ANOVA: Analysis of variance table for chlorophyll pigment concentration a+b (ug cm<sup>-2</sup>).  
C vs. TF vs. 1/100GLI. Day 60.

C: negative control.

TF: commercial fertilizer.

1/100GLI: 1% NSBMH.

| Source | DF | Adj (SS) | Adj (MS) | F-value | P-value |
|--------|----|----------|----------|---------|---------|
| Factor | 2  | 15.88    | 7.940    | 0.75    | 0.514   |
| Error  | 6  | 63.83    | 10.639   |         |         |
| Total  | 8  | 79.71    |          |         |         |

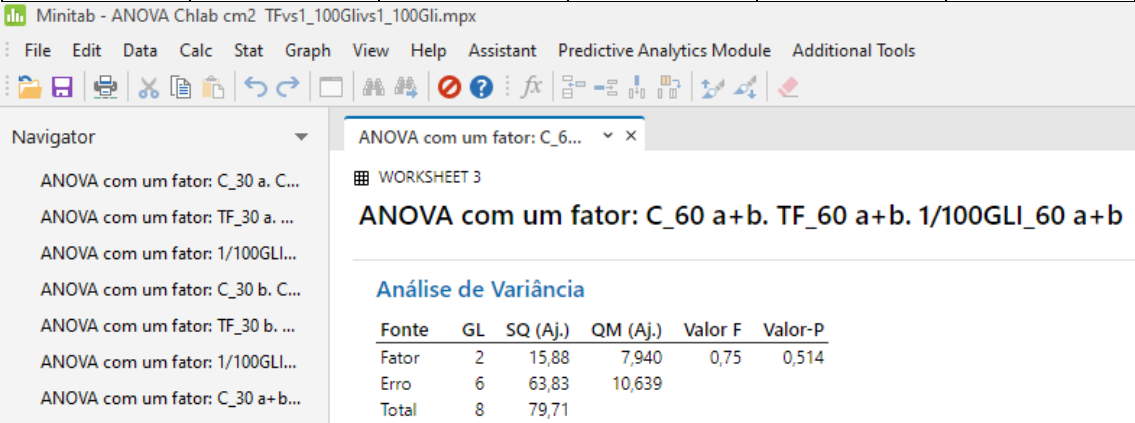

One-way ANOVA: Analysis of variance table for chlorophyll pigment concentration a+b (ug cm<sup>-2</sup>).  
C vs. TF vs. 1/100GLI. Day 90.

C: negative control.

TF: commercial fertilizer.

1/100GLI: 1% NSBMH.

| Source | DF | Adj (SS) | Adj (MS) | F-value | P-value |
|--------|----|----------|----------|---------|---------|
| Factor | 2  | 177.96   | 88.98    | 7.03    | 0.027   |
| Error  | 6  | 75.93    | 12.66    |         |         |
| Total  | 8  | 253.90   |          |         |         |

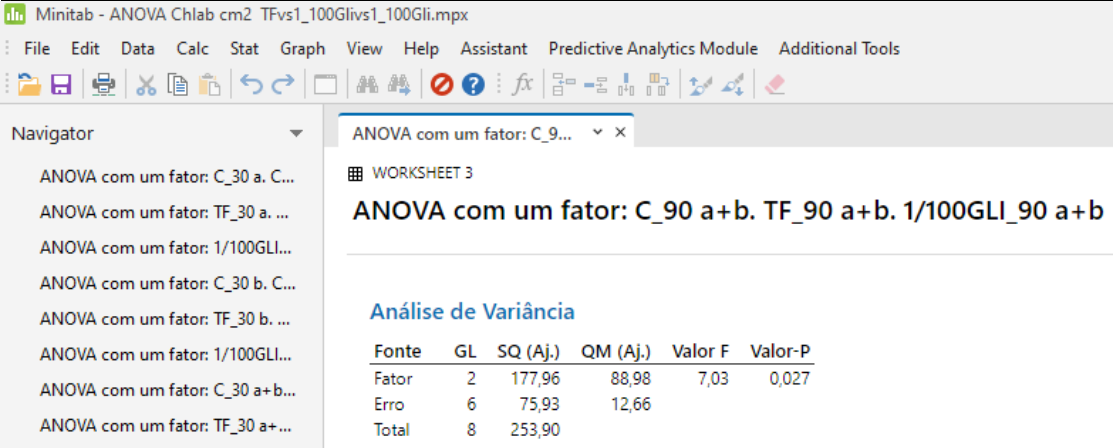

One-way ANOVA: Analysis of variance table for plant fresh mass (g)

PFW: plant fresh mass.

C: negative control.

Tf: commercial fertilizer.

1/1002%Gli: 1% NSBMH.

| Source | DF | Adj (SS) | Adj (MS) | F-value | P-value |
|--------|----|----------|----------|---------|---------|
| Factor | 2  | 468.5    | 234.25   | 9.39    | 0.014   |
| Error  | 6  | 149.7    | 24.95    |         |         |
| Total  | 8  | 618.2    |          |         |         |

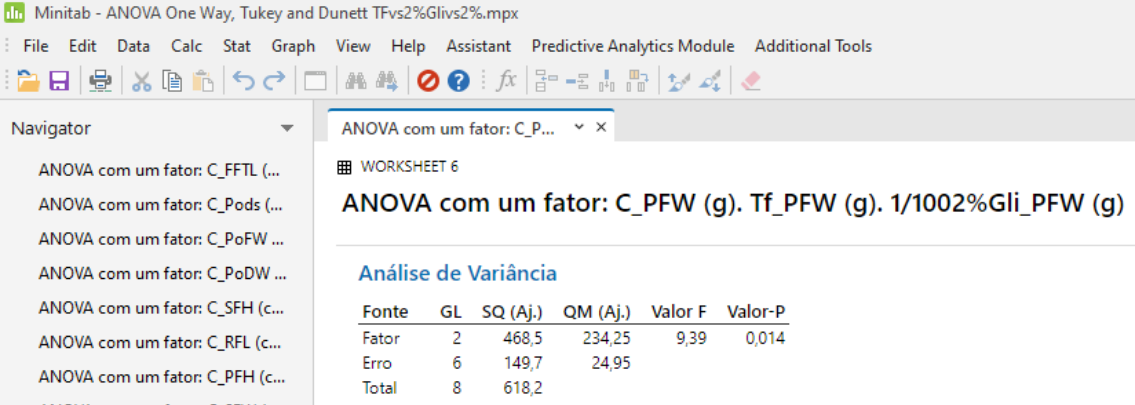

### One-way ANOVA: Analysis of variance table for plant dried mass (g)

PDW: plant dried mass.

C: negative control.

Tf: commercial fertilizer.

1/1002%Gli: 1% NSBMH.

| Source | DF | Adj (SS) | Adj (MS) | F-value | P-value |
|--------|----|----------|----------|---------|---------|
| Factor | 2  | 38.003   | 19.002   | 18.23   | 0.003   |
| Error  | 6  | 6.253    | 1.042    |         |         |
| Total  | 8  | 44.256   |          |         |         |

Minitab - ANOVA One Way, Tukey and Dunnett TFvs2%Glivs2%.mpx

File Edit Data Calc Stat Graph View Help Assistant Predictive Analytics Module Additional Tools

Navigator

- ANOVA com um fator: C\_FFTL (...)
- ANOVA com um fator: C\_Pods (...)
- ANOVA com um fator: C\_PoFW ...
- ANOVA com um fator: C\_PoDW ...
- ANOVA com um fator: C\_SFH (c...
- ANOVA com um fator: C\_RFL (c...
- ANOVA com um fator: C\_PFH (c...

ANOVA com um fator: C\_P... x

WORKSHEET 6

ANOVA com um fator: C\_PDW (g). Tf\_PDW (g). 1/1002%Gli\_PDW (g)

**Análise de Variância**

| Fonte | GL | SQ (Aj.) | QM (Aj.) | Valor F | Valor-P |
|-------|----|----------|----------|---------|---------|
| Fator | 2  | 38,003   | 19,002   | 18,23   | 0,003   |
| Erro  | 6  | 6,253    | 1,042    |         |         |
| Total | 8  | 44,256   |          |         |         |

### One-way ANOVA: Analysis of variance table for plant height (cm)

PFH: plant fresh height.

C: negative control.

Tf: commercial fertilizer.

1/1002%Gli: 1% NSBMH.

| Source | DF | Adj (SS) | Adj (MS) | F-value | P-value |
|--------|----|----------|----------|---------|---------|
| Factor | 2  | 1694.4   | 847.21   | 28.26   | 0.001   |
| Error  | 6  | 179.9    | 29.98    |         |         |
| Total  | 8  | 1874.3   |          |         |         |

Minitab - ANOVA One Way, Tukey and Dunnett TFvs2%Glivs2%.mpx

File Edit Data Calc Stat Graph View Help Assistant Predictive Analytics Module Additional Tools

Navigator

- ANOVA com um fator: C\_FFTL (...)
- ANOVA com um fator: C\_Pods (...)
- ANOVA com um fator: C\_PoFW ...
- ANOVA com um fator: C\_PoDW ...
- ANOVA com um fator: C\_SFH (c...
- ANOVA com um fator: C\_RFL (c...
- ANOVA com um fator: C\_PFH (c...

ANOVA com um fator: C\_P... x

WORKSHEET 6

ANOVA com um fator: C\_PFH (cm). Tf\_PFH (cm). 1/1002%Gli\_PFH (cm)

**Análise de Variância**

| Fonte | GL | SQ (Aj.) | QM (Aj.) | Valor F | Valor-P |
|-------|----|----------|----------|---------|---------|
| Fator | 2  | 1694,4   | 847,21   | 28,26   | 0,001   |
| Erro  | 6  | 179,9    | 29,98    |         |         |
| Total | 8  | 1874,3   |          |         |         |

### One-way ANOVA: Analysis of variance table for pod number (n°)

C: negative control.

Tf: commercial fertilizer.

1/1002%Gli: 1% NSBMH.

| Source | DF | Adj (SS) | Adj (MS) | F-value | P-value |
|--------|----|----------|----------|---------|---------|
| Factor | 2  | 3.062    | 1.531    | 0.31    | 0.745   |
| Error  | 6  | 29.704   | 4.951    |         |         |
| Total  | 8  | 32.765   |          |         |         |

Minitab - ANOVA One Way, Tukey and Dunett TFvs2%Glivs2%.mpx

File Edit Data Calc Stat Graph View Help Assistant Predictive Analytics Module Additional Tools

Navigator

- ANOVA com um fator: C\_FFTL (...)
- ANOVA com um fator: C\_Pods (N°)
- ANOVA com um fator: C\_PoFW ...
- ANOVA com um fator: C\_PoDW ...
- ANOVA com um fator: C\_SFH (c...
- ANOVA com um fator: C\_RFL (c...
- ANOVA com um fator: C\_PFH (c...

ANOVA com um fator: C\_Pods (N°). Tf\_Pods (N°). 1/1002%Gli\_Pods (N°)

**Análise de Variância**

| Fonte | GL | SQ (Aj.) | QM (Aj.) | Valor F | Valor-P |
|-------|----|----------|----------|---------|---------|
| Fator | 2  | 3,062    | 1,531    | 0,31    | 0,745   |
| Erro  | 6  | 29,704   | 4,951    |         |         |
| Total | 8  | 32,765   |          |         |         |

### One-way ANOVA: Analysis of variance table for pod fresh mass (g)

PoFW: pod fresh mass.

C: negative control.

Tf: commercial fertilizer.

1/1002%Gli: 1% NSBMH

| Source | DF | Adj (SS) | Adj (MS) | F-value | P-value |
|--------|----|----------|----------|---------|---------|
| Factor | 2  | 0.8579   | 0.4289   | 0.30    | 0.754   |
| Error  | 6  | 8.6937   | 1.4489   |         |         |
| Total  | 8  | 9.5515   |          |         |         |

Minitab - ANOVA One Way, Tukey and Dunett TFvs2%Glivs2%.mpx

File Edit Data Calc Stat Graph View Help Assistant Predictive Analytics Module Additional Tools

Navigator

- ANOVA com um fator: C\_FFTL (...)
- ANOVA com um fator: C\_Pods (...)
- ANOVA com um fator: C\_PoFW (g)
- ANOVA com um fator: C\_PoDW ...
- ANOVA com um fator: C\_SFH (c...
- ANOVA com um fator: C\_RFL (c...
- ANOVA com um fator: C\_PFH (c...

ANOVA com um fator: C\_PoFW (g). Tf\_PoFW (g). 1/1002%Gli\_PoFW (g)

**Análise de Variância**

| Fonte | GL | SQ (Aj.) | QM (Aj.) | Valor F | Valor-P |
|-------|----|----------|----------|---------|---------|
| Fator | 2  | 0,8579   | 0,4289   | 0,30    | 0,754   |
| Erro  | 6  | 8,6937   | 1,4489   |         |         |
| Total | 8  | 9,5515   |          |         |         |



### One-way ANOVA: Analysis of variance table for pod dried mass (g)

PoDW: pod dried mass.

C: negative control.

Tf: commercial fertilizer.

1/1002%Gli: 1% NSBMH.

| Source | DF | Adj (SS) | Adj (MS) | F-value | P-value |
|--------|----|----------|----------|---------|---------|
| Factor | 2  | 0.02402  | 0.01201  | 0.25    | 0.785   |
| Error  | 6  | 0.28508  | 0.04751  |         |         |
| Total  | 8  | 0.30910  |          |         |         |

Minitab - ANOVA One Way, Tukey and Dunnett TFvs2%Glivs2%.mpx

File Edit Data Calc Stat Graph View Help Assistant Predictive Analytics Module Additional Tools

Navigator

- ANOVA com um fator: C\_FFTL (...)
- ANOVA com um fator: C\_Pods (...)
- ANOVA com um fator: C\_PoFW ...
- ANOVA com um fator: C\_PoDW ...**
- ANOVA com um fator: C\_SFH (c...
- ANOVA com um fator: C\_RFL (c...
- ANOVA com um fator: C\_PFH (c...

ANOVA com um fator: C\_PoDW (g). Tf\_PoDW (g). 1/1002%Gli\_PoDW (g)

WORKSHEET 6

**Análise de Variância**

| Fonte | GL | SQ (Aj.) | QM (Aj.) | Valor F | Valor-P |
|-------|----|----------|----------|---------|---------|
| Fator | 2  | 0,02402  | 0,01201  | 0,25    | 0,785   |
| Erro  | 6  | 0,28508  | 0,04751  |         |         |
| Total | 8  | 0,30910  |          |         |         |

### One-way ANOVA: Analysis of variance table for nitrogen concentration (gN g<sup>-1</sup>)

C: negative control.

Tf: commercial fertilizer.

1/100NSBMH: 1% NSBMH.

| Source | DF | Adj (SS) | Adj (MS) | F-value | P-value |
|--------|----|----------|----------|---------|---------|
| Factor | 2  | 0.000022 | 0.000011 | 10.01   | 0.012   |
| Error  | 6  | 0.000007 | 0.000001 |         |         |
| Total  | 8  | 0.000029 |          |         |         |

Minitab - ANOVA One way, Tukey and Dunnett Tf vs 1%NSBMH+2%Gli.mpx

File Edit Data Calc Stat Graph View Help Assistant Predictive Analytics Module Additional Tools

Navigator

- ANOVA com um fator: C (gN g-...**
- ANOVA com um fator: C (gP20...

ANOVA com um fator: C (gN g-1). Tf (gN g-1). 1/100NSBMH (gN g-1)

WORKSHEET 1

**Análise de Variância**

| Fonte | GL | SQ (Aj.) | QM (Aj.) | Valor F | Valor-P |
|-------|----|----------|----------|---------|---------|
| Fator | 2  | 0,000022 | 0,000011 | 10,01   | 0,012   |
| Erro  | 6  | 0,000007 | 0,000001 |         |         |
| Total | 8  | 0,000029 |          |         |         |

One-way ANOVA: Analysis of variance table for phosphorus concentration (gP<sub>2</sub>O<sub>5</sub> g<sup>-1</sup>)

C: negative control.

Tf: commercial fertilizer.

1/100NSBMH: 1% NSBMH.

| Source | DF | Adj (SS) | Adj (MS) | F-value | P-value |
|--------|----|----------|----------|---------|---------|
| Factor | 2  | 0.000000 | 0.000000 | 0.17    | 0.846   |
| Error  | 6  | 0.000000 | 0.000000 |         |         |
| Total  | 8  | 0.000000 |          |         |         |

Minitab - ANOVA One way, Tukey and Dunett Tf vs 1%NSBMH+2%Gli.mpx

File Edit Data Calc Stat Graph View Help Assistant Predictive Analytics Module Additional Tools

Navigator

ANOVA com um fator: C (gN g-...  
ANOVA com um fator: C (gP2O...

ANOVA com um fator: C (g... x

WORKSHEET 1

ANOVA com um fator: C (gP2O5 g-1). Tf (gP2O5 g-1). 1/100NSBMH (gP2O5 g-1)

Análise de Variância

| Fonte | GL | SQ (Aj.) | QM (Aj.) | Valor F | Valor-P |
|-------|----|----------|----------|---------|---------|
| Fator | 2  | 0,000000 | 0,000000 | 0,17    | 0,846   |
| Erro  | 6  | 0,000000 | 0,000000 |         |         |
| Total | 8  | 0,000000 |          |         |         |
